# Supplementary material for: Development and Validation of Two Questionnaires to Study the Perception of Conflict in Physical Education
Source: MDPI journal article supplement (doi:10.3390/ijerph17176241), 2020-08-27
Supplement: s1 [file s1]

**Table S1.** Data Distribution of the CONFLICT1-AGE (Version 1).

| Item                                                                                                                            | 1           | 2    | 3    | 4    | 5           |
|---------------------------------------------------------------------------------------------------------------------------------|-------------|------|------|------|-------------|
| In the game the conflicts I caused have been so because I have insulted someone                                                 | 43.6        | 0.7  | 0.3  | 3.0  | <b>52.3</b> |
| In the game the conflicts I caused have been so because of my rules misunderstanding                                            | <b>76.3</b> | 7.2  | 6.7  | 1.2  | 8.6         |
| In the game, the conflicts I've caused came from me inadvertently bumping into someone else.                                    | 34.4        | 3.2  | 3.9  | 9.1  | <b>49.5</b> |
| In the game, the conflicts I have caused came from my non-respect of the agreements.                                            | <b>67.8</b> | 7.4  | 4.4  | 0.2  | 20.3        |
| In the game, the conflicts I have caused have been so because I've hit someone else.                                            | <b>47.7</b> | 0.7  | 1.5  | 3.2  | 47.0        |
| In the game, the conflicts I have caused have been so because I have cheated.                                                   | 35.9        | 3.4  | 0.3  | 0.0  | <b>60.4</b> |
| In the game, the conflicts I have caused have been so because I have cheated and this has hurt me.                              | <b>66.4</b> | 10.1 | 5.2  | 5.7  | 12.6        |
| In the game, the conflicts I have caused have been so because I have made a wrong decision.                                     | <b>60.9</b> | 1.3  | 3.4  | 1.5  | 32.9        |
| In the game, the conflicts I have caused have been so because I did not respect the game's rule.                                | <b>53.2</b> | 8.6  | 8.4  | 8.4  | 21.5        |
| In the game, the conflicts I have caused have been so because I was wrong trying to achieve the objective of the game.          | <b>53.7</b> | 16.9 | 13.4 | 2.7  | 13.3        |
| In the game, the conflicts I have caused have been so because I cheated and have been sanctioned.                               | <b>53.9</b> | 0.2  | 0.2  | 0.0  | 45.8        |
| In the game, the conflicts I have caused have been so because someone was wrong in trying to achieve the objective of the game. | <b>55.5</b> | 8.9  | 13.6 | 4.9  | 17.1        |
| In the game, the conflicts I have caused have been so because someone has not respected the initial agreements.                 | <b>47.0</b> | 13.1 | 12.1 | 19.0 | 8.9         |
| In the game, the conflicts I have caused have been so because someone has cheated.                                              | 44.1        | 3.5  | 1.0  | 0.2  | <b>51.2</b> |
| In the game, the conflicts I have caused have been so because someone has made a wrong decision in the game.                    | <b>42.1</b> | 16.9 | 18.5 | 14.9 | 7.6         |
| In the game, the conflicts I have caused have been so because someone has insulted me.                                          | <b>58.2</b> | 0.8  | 1.0  | 1.5  | 38.4        |
| In the game, the conflicts I have caused have been so because someone has cheated and has not been sanctioned.                  | <b>50.7</b> | 0.5  | 10.4 | 3.2  | 35.2        |
| In the game, the conflicts I have caused have been so because someone has cheated and this affected me.                         | <b>46.5</b> | 9.9  | 10.4 | 17.1 | 16.1        |
| In the game, the conflicts I have caused have been so because someone has inadvertently bumped into me.                         | <b>43.1</b> | 13.4 | 15.4 | 16.1 | 11.9        |
| In the game, the conflicts I have caused have been so because someone did not follow the rules of the game.                     | <b>38.8</b> | 11.1 | 11.7 | 16.3 | 22.1        |
| In the game, the conflicts I have caused have been so because someone hit me.                                                   | <b>67.8</b> | 0.8  | 2.0  | 0.7  | 28.7        |

*Note.*  $n = 596$ . No missing values were observed. The most selected category for each item is highlighted in bold. 1 = totally disagree, 2 = disagree, 3 = neither agree nor disagree, 4 = agree, 5 = totally agree.

**Table S2.** Data Distribution of the CONFLICT1-RES (Version 1).

| Item                                                                              | 1           | 2    | 3   | 4    | 5           |
|-----------------------------------------------------------------------------------|-------------|------|-----|------|-------------|
| In the game, when I caused some conflict I have been insulted.                    | 38,1        | 1,5  | 0,8 | 1,7  | <b>57,9</b> |
| In the game, when someone pushed me to the limit, I have beaten him.              | <b>77,2</b> | 1,3  | 0,8 | ,7   | 20,0        |
| In the game, when someone pushed me to the limit, I have insulted him.            | 34,2        | 1,3  | 2,2 | 1,5  | <b>60,7</b> |
| In the game, when I caused some conflict, I have been insulted and beaten.        | <b>50,3</b> | 12,8 | 8,1 | 12,4 | 16,4        |
| In the game, when I caused some conflict, I have been beaten.                     | <b>65,6</b> | 1,5  | 0,7 | ,2   | 32,0        |
| In the game, when someone pushed me to the limit, I have insulted and beaten him. | <b>52,5</b> | 5,0  | 2,9 | 12,2 | 27,3        |

*Note.*  $n = 596$ . No missing values were observed. The most selected category for each item is highlighted in bold. 1 = totally disagree, 2 = disagree, 3 = neither agree nor disagree, 4 = agree, 5 = totally agree.
